# Supplementary material
Source: publisher figshare collection journal article supplement (https://karger.figshare.com/ndownloader/files/35098030)
Supplement: Supplementary file 1 [file 35098030]

**Supplementary Tables & Figures**

**Supplementary Table 1.** Among the 48 articles that were assessed full text, below are the reasons for the exclusion of 39 articles

| **Study** | **Reference** | **Reason for exclusion** |
| --- | --- | --- |
| **FROM PREVIOUS META-ANALYSIS OF THOMPSON OR ZENG**1,2 | | |
| Clayman, 2005 | 3 | Node-negative in 183/210 (87%).  Univariate and multivariate analysis does not report HR for DSD separately for node-negative cSCC |
| Friedman, 1985 | 4 | 61/63 with clinically localized cSCC (97%), 2/63 with regional metastasis  5 patients died of cSCC (2 with regional metastasis at first presentation). |
| Goepfert, 1984 | 5 | DSD not reported |
| Kyrgidis 2010 | 6 | DSD not reported |
| Schmidt, 2015 | 7 | All had nodal metastatic cSCC |
| **FROM NEW SEARCH** | | |
| ADAMS, 2020 | https://doi.org/10.1111/ajd.13290 | DSD NOT REPORTED |
| AMIT, 2020 | https://doi.org/10.1016/j.ejca.2020.11.019 | NODE NEGATIVE IN 88.8% |
| BARRIERA-SILVESTRINI, 2021 | https://doi.org/10.1002/lary.28978 | IN REFERENCE TO ARTICLE |
| BERNAL MARTINEZ, 2020 | https://doi.org/10.1016/j.ad.2018.09.025 | RISK FACTORS NOT ASSESSED FOR DSD |
| BOWE, 2020 | https://doi.org/10.1016/j.bjoms.2020.08.028 | RISK FACTORS OF INTEREST NOT ASSESSED |
| CANUETO, 2020 | https://doi.org/10.1111/jdv.16001 | DSD NOT REPORTED. IT WAS REPORTED AS PART OF 'DISEASE-SPECIFIC POOR OUTCOMES' |
| CONDE-FERREIROS, 2020 | https://doi.org/10.1016/j.jaad.2020.03.088 | SALAMANCA HOSPITAL., 2005-2016. INCLUDED T3 CASES (MULTIPLE BASELINE RISK FACTORS: >4 DIAMETER, OR THICKNESS>6 MM OR BEYOND SUBCUTANEOUS FAT, OR PNI OR MNOR BONE EROSION). FROM POOL OF PATIENTS STUDIED IN CONDE-FERREIROS, JAAD AUGUST,2020 (MULTICENTER, INCLUDED IPNI CASES) |
| DONG, 2020 | https://doi.org/10.1016/j.jaad.2020.03.027 | DSD NOT REPORTED |
| HAUG, 2020 | https://doi.org/10.1016/j.jid.2020.01.035 | DSD NOT REPORTED |
| JAMBUSARIA-PAHLAJANI, 2020 | https://doi.org/10.1016/j.jid.2020.05.094 | COMMENTARY |
| JOHNSTON, 2020 | https://doi.org/10.1016/j.jaad.2020.08.089 | DSD DID NOT OCCUR |
| KNUUTILA, 2020 | https://doi.org/10.2340/00015555-3628 | DSD NOT REPORTED |
| KORHONEN, 2020 | https://doi.org/10.2340/00015555-3479 | DSD NOT REPORTED |
| LEDERHANDLER, 2020 | https://doi.org/10.1016/j.jaad.2019.12.007 | SURGICAL CHALLENGE CASE |
| LEUS, 2021 | https://doi.org/10.1001/jamadermatol.2020.4828 | DSD NOT REPORTED. IT WAS REPORTEED AS PART OF PROGRESSION OF DISEASE WITH LR AND NM |
| MO, 2020 | https://doi.org/10.1016/j.jaad.2020.09.035 | DSD NOT REPORTED |
| MULL, 2020 | https://doi.org/10.1097/dss.0000000000002336 | DSD DID NOT OCCUR |
| PUEBLA-TORNERO, 2021 | https://doi.org/10.1016/j.jaad.2020.12.020 | DSD NOT REPORTED. IT WAS REPORTED AS PART OF 'DISEASE-SPECIFIC POOR OUTCOMES' |
| REYNOLDS, 2020 | https://doi.org/10.1111/bjd.19693 | RISK FACTORS NOT ASSESSED |
| RITTER, 2020 | https://doi.org/10.1002/hed.26546 | NO HR REPORTED. METASTATIC TOGETHER WITH LOCALIZED. |
| RODRIGUEZ, 2020 | https://doi.org/10.1016/j.jaad.2020.08.083 | DSD NOT REPORTED |
| RUIZ, 2020 | https://doi.org/10.1016/j.jaad.2019.07.048 | RISK FACTORS OF INTEREST MATCHED |
| SAITO, 2020 | https://doi.org/10.1007/s10147-020-01830-7 | RISK FACTORS OF INTEREST NOT ASSESSED FOR DSD |
| SAYAN, 2020 | https://doi.org/10.1016/j.bjoms.2020.04.029 | DSD NOT REPORTED |
| SOOD, 2020 | https://doi.org/10.12968/jowc.2020.29.10.556 | RISK FACTORS OF INTEREST NOT ASSESSED |
| STEVENSON, 2020 | https://doi.org/10.1001/jamadermatol.2020.1984 | RISK FACTORS OF INTEREST NOT ASSESSED |
| SVENSSON, 2020 | https://doi.org/10.2340/00015555-3532 | DSD NOT REPORTED |
| TOPPI, 2020 | https://doi.org/10.1111/ans.16095 | DSD NOT REPORTED |
| TROSMAN, 2021 | https://doi.org/10.1002/lary.28564 | NODAL METASTASIS IN 48% AT STUDY PRESENTATION |
| UPTON, 2021 | https://doi.org/10.1002/lary.28982 | RESPONSE TO LETTER |
| UPTON, 2021 | https://doi.org/10.1002/lary.28633 | DSD NOT REPORTED |
| XIONG, 2020 | https://doi.org/10.1016/j.jaad.2019.12.049 | DSD NOT REPORTED. IT WAS REPORTED TOGETHER WITH RECURRENCE AS OVERALL POOR OUTCOMES |
| YUNG, 2021 | https://doi.org/10.1245/s10434-020-09431-4 | VERMILION LIP |
| ZENG, 2020 | https://doi.org/10.1371/journal.pone.0239586 | META-ANALYSIS |

cSCCHN: cSCC of the head and neck, m: months, P: prospective, R: retrospective, y: years

**Supplementary Table 2.** Newcastle-Ottawa Scale Scoring of included cohort studiesa

| **Study** | **Study Type** | **Selection** | **Comparability** | **Exposure or Outcome** | **Assessment of quality** |
| --- | --- | --- | --- | --- | --- |
| Brinkman, 20158 | Cohort of consecutive cSCC | **** |  | *** | Medium (NOS: 7) |
| Conde-Ferreiros, 20209 | Cohort of cSCC with iPNI | *** | ** | ** | Medium (NOS: 7) |
| Eigentler, 201710 | Cohort of cSCC | **** | ** | ** | High (NOS: 8) |
| Griffiths, 200211 | Cohort of consecutive cSCC | *** |  | *** | Medium (NOS: 6) |
| Karia, 201412 | Cohort of consecutive cSCC | **** | ** | *** | High (NOS: 9) |
| Ruiz, 201913 | Cohort of cSCC with histologic positive margins treated with salvage irradiation | *** |  | ** | Medium (NOS: 5) |
| Schmults, 201314 | Cohort of cSCC | **** | ** | *** | High (NOS: 9) |
| Tam, 202015 | Cohort of cSCC | **** | ** | ** | High (NOS: 8) |
| Tschetter, 202016 | Cohort of cSCC | **** | ** | *** | High (NOS: 9) |

a NOS scores may range from 0 to 9. Possible scores are 0 to 4 asterisks for selection. 0 to 2 asterisks for comparability, and 0 to 3 asterisks for exposure or outcome. The total scores may range from zero to nine points, with a score of lower than five indicating poor quality, five to seven indicating medium quality, and higher than seven representing high quality.

**Supplementary Figure 1.** Forest plots of the association of risk factors for DSD in included studies reporting clear margins after surgery in all cases


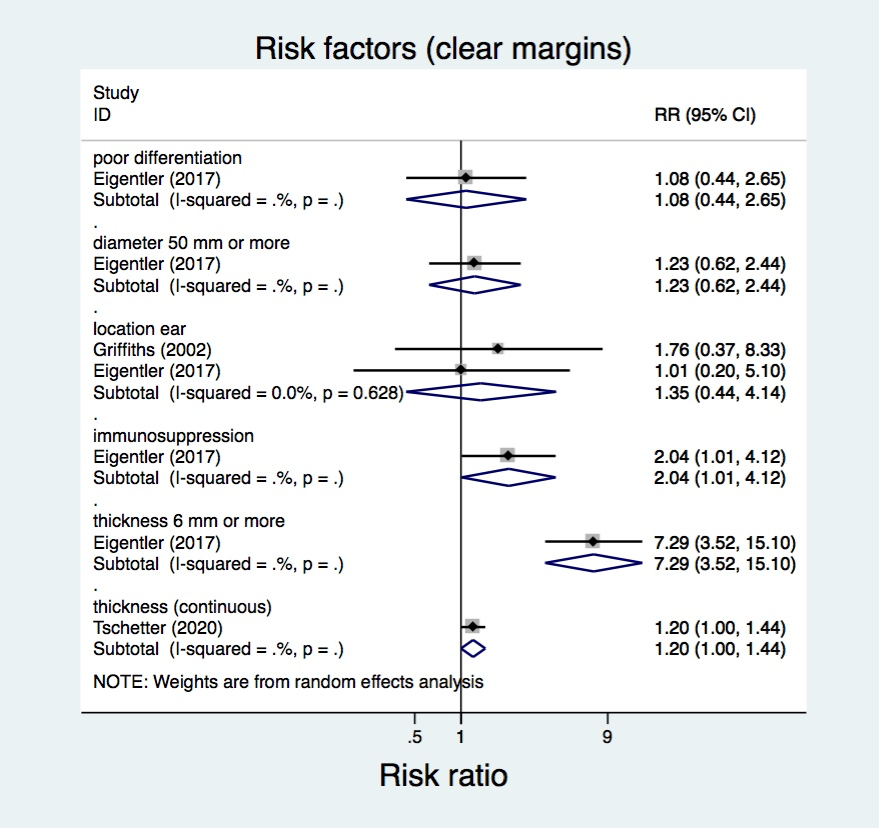


**References for Supplementary material**

1. Thompson AK, Kelley BF, Prokop LJ, Murad MH, Baum CL. Risk Factors for Cutaneous Squamous Cell Carcinoma Recurrence, Metastasis, and Disease-Specific Death: A Systematic Review and Meta-analysis. *JAMA Dermatol.* 2016;152(4):419-428.

2. Zeng S, Fu L, Zhou P, Ling H. Identifying risk factors for the prognosis of head and neck cutaneous squamous cell carcinoma: A systematic review and meta-analysis. *PloS one.* 2020;15(9):e0239586.

3. Clayman GL, Lee JJ, Holsinger FC, et al. Mortality risk from squamous cell skin cancer. *J Clin Oncol.* 2005;23(4):759-765.

4. Friedman HI, Cooper PH, Wanebo HJ. Prognostic and therapeutic use of microstaging of cutaneous squamous cell carcinoma of the trunk and extremities. *Cancer.* 1985;56(5):1099-1105.

5. Goepfert H, Dichtel WJ, Medina JE, Lindberg RD, Luna MD. Perineural invasion in squamous cell skin carcinoma of the head and neck. *Am J Surg.* 1984;148(4):542-547.

6. Kyrgidis A, Tzellos TG, Kechagias N, et al. Cutaneous squamous cell carcinoma (SCC) of the head and neck: risk factors of overall and recurrence-free survival. *Eur J Cancer.* 2010;46(9):1563-1572.

7. Schmidt C, Martin JM, Khoo E, Plank A, Grigg R. Outcomes of nodal metastatic cutaneous squamous cell carcinoma of the head and neck treated in a regional center. *Head Neck.* 2015;37(12):1808-1815.

8. Brinkman JN, Hajder E, van der Holt B, Den Bakker MA, Hovius SE, Mureau MA. The Effect of Differentiation Grade of Cutaneous Squamous Cell Carcinoma on Excision Margins, Local Recurrence, Metastasis, and Patient Survival: A Retrospective Follow-Up Study. *Ann Plast Surg.* 2015;75(3):323-326.

9. Conde-Ferreiros A, Corchete LA, Jaka A, et al. Patterns of Incidental Perineural Invasion and Prognosis in Cutaneous Squamous Cell Carcinoma: A Multicenter, Retrospective Cohort Study. *J Am Acad Dermatol.* 2020.

10. Eigentler TK, Leiter U, Hafner HM, Garbe C, Rocken M, Breuninger H. Survival of Patients with Cutaneous Squamous Cell Carcinoma: Results of a Prospective Cohort Study. *J Invest Dermatol.* 2017;137(11):2309-2315.

11. Griffiths RW, Feeley K, Suvarna SK. Audit of clinical and histological prognostic factors in primary invasive squamous cell carcinoma of the skin: assessment in a minimum 5 year follow-up study after conventional excisional surgery. *Br J Plast Surg.* 2002;55(4):287-292.

12. Karia PS, Jambusaria-Pahlajani A, Harrington DP, Murphy GF, Qureshi AA, Schmults CD. Evaluation of American Joint Committee on Cancer, International Union Against Cancer, and Brigham and Women's Hospital tumor staging for cutaneous squamous cell carcinoma. *J Clin Oncol.* 2014;32(4):327-334.

13. Ruiz ES, Koyfman SA, Kass J, Schmults CD. Surgery and Salvage Limited-Field Irradiation for Control of Cutaneous Squamous Cell Carcinoma With Microscopic Residual Disease. *JAMA Dermatol.* 2019.

14. Schmults CD, Karia PS, Carter JB, Han J, Qureshi AA. Factors predictive of recurrence and death from cutaneous squamous cell carcinoma: a 10-year, single-institution cohort study. *JAMA Dermatol.* 2013;149(5):541-547.

15. Tam S, Yao C, Amit M, et al. Association of Immunosuppression With Outcomes of Patients With Cutaneous Squamous Cell Carcinoma of the Head and Neck. *JAMA Otolaryngol Head Neck Surg.* 2020;146(2):128-135.

16. Tschetter AJ, Campoli MR, Zitelli JA, Brodland DG. Long-term clinical outcomes of patients with invasive cutaneous squamous cell carcinoma treated with Mohs micrographic surgery: A 5-year, multicenter, prospective cohort study. *J Am Acad Dermatol.* 2020;82(1):139-148.
